# Supplementary material
Source: PubMed Central journal article supplement (PMC3255604)
Supplement: supp_78.1.170_AEM-AEM06604-11-s01.pdf [file supp_78.1.170_AEM-AEM06604-11-s01.pdf]

**Supplemental Table S1. Genes differentially expressed by change in growth rate.**

Data from microarray analyses. Significantly regulated genes are  $q < 0.05$  (bold). “NA” denotes non expressed or excluded genes. \*Genes statistically differences in transcription between the lowest and the higher growth rates.

| ID                                                           | Gene        | Name                                              | 0.05/0.15        |             | 0.4/0.15         |             |
|--------------------------------------------------------------|-------------|---------------------------------------------------|------------------|-------------|------------------|-------------|
|                                                              |             |                                                   | log <sub>2</sub> | qVal.       | log <sub>2</sub> | qVal.       |
| <b>Biosynthesis of cofactors, prosthetic group, carriers</b> |             |                                                   |                  |             |                  |             |
| EF0051                                                       | <i>ispE</i> | 4-diphosphocytidyl-2-C-methyl-D-erythritol kinase | 0.43             | 0.44        | <b>-1.43</b>     | <b>0.01</b> |
| EF1858                                                       | <i>panD</i> | Aspartate 1-decarboxylase                         | <b>-1.64</b>     | <b>0.04</b> | -1.24            | 0.09        |
| EF2776                                                       | <i>thiE</i> | Thiamine-phosphate pyrophosphorylase              | <b>2.21</b>      | <b>0.04</b> | 0.73             | 0.62        |
| EF2777                                                       |             | Hydroxyethylthiazole kinase                       | <b>1.70</b>      | <b>0.04</b> | 0.43             | 0.73        |
| <b>Cell envelope</b>                                         |             |                                                   |                  |             |                  |             |
| EF0025*                                                      |             | Membrane protein. putative                        | <b>-1.00</b>     | <b>0.02</b> | <b>0.60</b>      | <b>0.02</b> |
| EF0235                                                       |             | Membrane protein. putative                        | 0.24             | 0.70        | <b>1.11</b>      | <b>0.04</b> |
| EF0370                                                       |             | Septation ring formation regulator EzrA           | <b>-1.31</b>     | <b>0.01</b> | <b>-1.44</b>     | <b>0.00</b> |
| EF0490                                                       |             | LPX-motif cell wall anchor domain protein         | <b>2.07</b>      | <b>0.00</b> | <b>3.05</b>      | <b>0.00</b> |
| EF0516                                                       |             | Transcriptional regulator, putative               | 0.58             | 0.49        | <b>1.59</b>      | <b>0.04</b> |
| EF0989                                                       | <i>mraW</i> | S-adenosyl-methyltransferase MraW                 | -0.50            | 0.32        | <b>-1.14</b>     | <b>0.02</b> |
| EF0991                                                       | <i>pbpC</i> | Penicillin-binding protein                        | -0.74            | 0.28        | <b>-1.69</b>     | <b>0.03</b> |
| EF1583                                                       |             | N-acetylmuramoyl-L-alanine amidase                | -0.97            | 0.10        | <b>-1.29</b>     | <b>0.02</b> |
| EF1740                                                       |             | Penicillin-binding protein 1, putative            | 0.78             | 0.17        | <b>1.23</b>      | <b>0.02</b> |
| EF1751                                                       |             | Membrane protein. putative                        | <b>-1.12</b>     | <b>0.02</b> | <b>-0.54</b>     | <b>0.22</b> |
| EF2367                                                       |             | N-acetylmuramoyl-L-alanine amidase                | -0.69            | 0.13        | <b>-1.29</b>     | <b>0.01</b> |
| EF2891                                                       |             | Glycosyl transferase, group 1                     | -0.77            | 0.13        | <b>-1.02</b>     | <b>0.04</b> |
| EFB0051                                                      |             | Membrane protein, putative                        | 0.33             | 0.58        | <b>1.34</b>      | <b>0.02</b> |
| <b>Cellular processes</b>                                    |             |                                                   |                  |             |                  |             |
| EF0439*                                                      |             | Immunity protein PlnM, putative                   | <b>0.50</b>      | <b>0.02</b> | <b>-1.00</b>     | <b>0.00</b> |
| EF0990                                                       |             | Cell division protein                             | -0.37            | 0.52        | <b>-1.29</b>     | <b>0.01</b> |
| EF1151                                                       |             | Cell division protein DivIVA                      | -1.19            | 0.17        | <b>-1.81</b>     | <b>0.03</b> |
| EF2052                                                       |             | Cell division protein FtsK                        | <b>-1.61</b>     | <b>0.02</b> | <b>-2.42</b>     | <b>0.03</b> |
| EF2387                                                       |             | ParA family chromosome partitioning ATPase        | <b>-1.08</b>     | <b>0.02</b> | <b>-1.51</b>     | <b>0.01</b> |
| EF2739                                                       | <i>ahpC</i> | Alkyl hydroperoxide reductase                     | <b>-1.59</b>     | <b>0.02</b> | -0.56            | 0.40        |
| EFA0007                                                      |             | Ribosomal RNA adenine dimethylase family protein  | <b>-0.50</b>     | <b>0.18</b> | <b>-1.52</b>     | <b>0.00</b> |
| EFA0042                                                      |             | Cell wall surface anchor signal protein           | <b>1.16</b>      | <b>0.05</b> | <b>2.33</b>      | <b>0.00</b> |
| EFB0012                                                      | <i>prgC</i> | Surface protein PrgC                              | 1.03             | 0.24        | <b>1.45</b>      | <b>0.03</b> |
| <b>Conserved hypothetical protein</b>                        |             |                                                   |                  |             |                  |             |
| EF0003                                                       |             | Conserved hypothetical protein                    | <b>-1.00</b>     | <b>0.01</b> | <b>-0.72</b>     | <b>0.04</b> |
| EF0145                                                       |             | Conserved hypothetical protein                    | <b>1.10</b>      | <b>0.05</b> | <b>1.50</b>      | <b>0.03</b> |
| EF0349                                                       |             | Conserved hypothetical protein                    | <b>1.63</b>      | <b>0.02</b> | <b>2.40</b>      | <b>0.01</b> |
| EF0350                                                       |             | Conserved hypothetical protein                    | <b>1.49</b>      | <b>0.04</b> | <b>2.56</b>      | <b>0.00</b> |
| EF0469                                                       |             | Conserved hypothetical protein                    | <b>-1.19</b>     | <b>0.01</b> | <b>-1.16</b>     | <b>0.00</b> |
| EF0486                                                       |             | Conserved hypothetical protein                    | <b>2.00</b>      | <b>0.02</b> | <b>2.46</b>      | <b>0.00</b> |
| EF0487                                                       |             | Conserved hypothetical protein                    | <b>2.64</b>      | <b>0.02</b> | <b>1.54</b>      | <b>0.03</b> |
| EF0491                                                       |             | Conserved hypothetical protein                    | <b>2.17</b>      | <b>0.00</b> | <b>3.42</b>      | <b>0.00</b> |
| EF0500                                                       |             | Conserved hypothetical protein                    | <b>2.50</b>      | <b>0.00</b> | <b>3.67</b>      | <b>0.00</b> |
| EF1026                                                       |             | Conserved hypothetical protein                    | -0.48            | 0.30        | <b>-1.35</b>     | <b>0.00</b> |

|                          |                  |                                               |              |             |              |             |
|--------------------------|------------------|-----------------------------------------------|--------------|-------------|--------------|-------------|
| EF1541*                  |                  | Conserved hypothetical protein                | <b>-1.27</b> | <b>0.02</b> | <b>0.84</b>  | <b>0.23</b> |
| EF1682                   |                  | Conserved hypothetical protein                | <b>-1.39</b> | <b>0.05</b> | <b>-1.37</b> | <b>0.05</b> |
| EF1752                   |                  | Conserved hypothetical protein                | <b>-1.42</b> | <b>0.01</b> | <b>-1.08</b> | <b>0.02</b> |
| EF1753                   |                  | Conserved hypothetical protein                | <b>-1.46</b> | <b>0.03</b> | <b>-1.3</b>  | <b>0.04</b> |
| EF1861                   |                  | Conserved hypothetical protein                | <b>-1.51</b> | <b>0.04</b> | <b>-1.07</b> | <b>0.12</b> |
| EF2281                   |                  | Conserved hypothetical protein                | -0.02        | 0.97        | <b>-1.33</b> | <b>0.00</b> |
| EF2437                   |                  | Conserved hypothetical protein                | <b>-3.35</b> | <b>0.00</b> | <b>-2.55</b> | <b>0.00</b> |
| EF2604                   |                  | Conserved hypothetical protein                | 0.62         | 0.35        | <b>1.67</b>  | <b>0.01</b> |
| EF2606                   |                  | Conserved hypothetical protein                | <b>-1.06</b> | <b>0.02</b> | <b>-0.85</b> | <b>0.05</b> |
| EF2770                   |                  | Conserved hypothetical protein                | <b>2.19</b>  | <b>0.01</b> | 1.05         | 0.27        |
| EF2923                   |                  | Conserved hypothetical protein                | -0.31        | 0.60        | <b>-1.37</b> | <b>0.01</b> |
| EF2965                   |                  | Conserved hypothetical protein                | <b>-1.82</b> | <b>0.00</b> | -0.65        | 0.18        |
| EF3009                   |                  | Conserved hypothetical protein                | <b>1.18</b>  | <b>0.02</b> | <b>1.63</b>  | <b>0.01</b> |
| EF3115                   |                  | Conserved hypothetical protein                | -0.53        | 0.13        | <b>-1.22</b> | <b>0.00</b> |
| EF3151                   |                  | Conserved hypothetical protein                | -0.58        | 0.24        | <b>-1.25</b> | <b>0.01</b> |
| EFA0035                  |                  | Conserved hypothetical protein                | <b>2.36</b>  | <b>0.05</b> | <b>1.93</b>  | <b>0.02</b> |
| EFA0036                  |                  | Conserved hypothetical protein                | <b>1.85</b>  | <b>0.03</b> | <b>3.5</b>   | <b>0</b>    |
| EFA0037                  |                  | Conserved hypothetical protein                | <b>2.17</b>  | <b>0.03</b> | <b>1.56</b>  | <b>0.02</b> |
| EFA0048                  |                  | Conserved hypothetical protein                | <b>1.99</b>  | <b>0.04</b> | <b>1.26</b>  | <b>0.05</b> |
| EFA0065                  |                  | Conserved hypothetical protein                | <b>-1.32</b> | <b>0.02</b> | <b>-1.77</b> | <b>0.00</b> |
| EFA0066                  |                  | Conserved hypothetical protein                | <b>-0.95</b> | <b>0.01</b> | <b>-1.53</b> | <b>0.00</b> |
| EFB0013                  |                  | Conserved hypothetical protein                | <b>1.97</b>  | <b>0.02</b> | <b>2.38</b>  | <b>0.01</b> |
| EFB0033                  |                  | Conserved hypothetical protein                | <b>1.82</b>  | <b>0.02</b> | <b>2.69</b>  | <b>0.00</b> |
| <b>DNA metabolism</b>    |                  |                                               |              |             |              |             |
| EF0004                   |                  | recF protein                                  | <b>-1.32</b> | <b>0.00</b> | <b>-1.02</b> | <b>0.01</b> |
| EF0005                   |                  | DNA gyrase, B subunit                         | <b>-1.06</b> | <b>0.02</b> | <b>-0.86</b> | <b>0.04</b> |
| EF0325                   |                  | DNA polymerase I, putative                    | <b>1.3</b>   | <b>0.03</b> | 0.67         | 0.31        |
| EF0499                   | <i>ssb-2</i>     | Single-strand binding protein                 | <b>1.29</b>  | <b>0.04</b> | <b>1.95</b>  | <b>0.01</b> |
| EF0762                   | <i>uvrB</i>      | Excinuclease ABC, subunit B                   | 0.68         | 0.20        | <b>-1.29</b> | <b>0.01</b> |
| EF1521                   | <i>dnaG</i>      | DNA primase                                   | <b>-0.73</b> | <b>0.02</b> | <b>-1.68</b> | <b>0</b>    |
| EF2283*                  |                  | Resolvase family site-specific recombinase    | <b>1.26</b>  | <b>0.00</b> | <b>0.356</b> | <b>0.02</b> |
| <b>Energy metabolism</b> |                  |                                               |              |             |              |             |
| EF0900                   | <i>aldE</i>      | Aldehyde-alcohol dehydrogenase                | <b>-1.30</b> | <b>0.00</b> | <b>-1.00</b> | <b>0.01</b> |
| EF0956                   | <i>malB/bopE</i> | Beta-phosphoglucomutase                       | <b>1.20</b>  | <b>0.03</b> | 0.31         | 0.67        |
| EF1109                   |                  | Iron-sulfur cluster binding protein           | <b>-2.12</b> | <b>0.03</b> | -1.39        | 0.14        |
| EF1125                   |                  | Putative L-ascorbate 6-phosphate lactonase    | <b>-1.45</b> | <b>0.10</b> | <b>-2.54</b> | <b>0.00</b> |
| EF1211                   | <i>npr</i>       | NADH peroxidase                               | <b>-1.10</b> | <b>0.01</b> | -0.65        | 0.09        |
| EF1356                   |                  | Pyruvate dehydrogenase complex. E3 component. | -0.38        | 0.53        | <b>-1.22</b> | <b>0.02</b> |
|                          | <i>lpdA</i>      | Lipoamide dehydrogenase                       |              |             |              |             |
| EF1568                   |                  | Prephenate dehydratase                        | <b>-1.53</b> | <b>0.02</b> | -0.31        | 0.68        |
| EF2058                   |                  | Transport P-binding protein CydC, putative    | <b>-1.00</b> | <b>0.03</b> | -0.20        | 0.70        |
| EF2059                   |                  | Transport P-binding protein CydD, putative    | <b>-1.34</b> | <b>0.01</b> | -0.85        | 0.06        |
| EF2559                   |                  | Pyruvate flavodoxin/ferredoxin oxidoreductase | 0.67         | 0.30        | <b>-1.19</b> | <b>0.05</b> |
| EF2863                   |                  | Beta-N-acetylglucosaminidase, putative        | <b>1.28</b>  | <b>0.01</b> | -0.17        | 0.75        |
| EF3317                   |                  | Oxaloacetate decarboxylase, alpha subunit     | -0.02        | 0.96        | <b>1.01</b>  | <b>0.01</b> |
| EF3319                   | <i>citF</i>      | Citrate lyase, alpha subunit                  | -0.17        | 0.75        | <b>1.00</b>  | <b>0.03</b> |

|        |             |                                                                |       |      |             |             |
|--------|-------------|----------------------------------------------------------------|-------|------|-------------|-------------|
| EF3321 | <i>cidD</i> | Citrate lyase, gamma subunit                                   | -0.24 | 0.54 | <b>1.00</b> | <b>0.01</b> |
| EF3322 | <i>citC</i> | Citrate lyase ligase                                           | -0.05 | 0.94 | <b>1.13</b> | <b>0.02</b> |
| EF3324 |             | Sodium ion-translocating decarboxylase, beta subunit           | 0.18  | 0.76 | <b>1.92</b> | <b>0.00</b> |
| EF3325 |             | Acetyl-CoA carboxylase biotin carboxyl carrier protein subunit | -0.17 | 0.83 | <b>1.50</b> | <b>0.02</b> |

#### **Fatty acid and phospholipid metabolism**

|        |  |                                                            |              |             |              |             |
|--------|--|------------------------------------------------------------|--------------|-------------|--------------|-------------|
| EF0779 |  | Glycerophosphoryl diester phosphodiesterase family protein | 0.44         | 0.32        | <b>1.10</b>  | <b>0.01</b> |
| EF1608 |  | Cardiolipin synthetase, putative                           | 0.70         | 0.12        | <b>1.79</b>  | <b>0.00</b> |
| EF2618 |  | Carboxylesterase precursor, putative                       | <b>-1.21</b> | <b>0.00</b> | <b>-0.99</b> | <b>0.01</b> |

#### **Hypothetical protein**

|        |  |                      |              |             |              |             |
|--------|--|----------------------|--------------|-------------|--------------|-------------|
| EF0083 |  | Hypothetical protein | <b>-1.56</b> | <b>0.03</b> | <b>0.54</b>  | <b>0.43</b> |
| EF0128 |  | Hypothetical protein | <b>-1.05</b> | <b>0.04</b> | <b>-1.30</b> | <b>0.01</b> |
| EF0340 |  | Hypothetical protein | 1.46         | 0.10        | <b>2.31</b>  | <b>0.03</b> |
| EF0341 |  | Hypothetical protein | 1.49         | 0.07        | <b>2.04</b>  | <b>0.04</b> |
| EF0477 |  | Hypothetical protein | -0.53        | 0.24        | <b>-1.59</b> | <b>0.00</b> |
| EF0532 |  | Hypothetical protein | -0.76        | 0.25        | <b>-1.34</b> | <b>0.04</b> |
| EF0566 |  | Hypothetical protein | -0.79        | 0.10        | <b>-1.40</b> | <b>0.02</b> |
| EF0573 |  | Hypothetical protein | <b>1.71</b>  | <b>0.01</b> | NA           | NA          |
| EF0605 |  | Hypothetical protein | -0.63        | 0.46        | <b>-2.23</b> | <b>0.00</b> |
| EF0723 |  | Hypothetical protein | 0.41         | 0.35        | <b>1.09</b>  | <b>0.01</b> |
| EF0769 |  | Hypothetical protein | -0.60        | 0.19        | <b>-1.12</b> | <b>0.01</b> |
| EF0778 |  | Hypothetical protein | 0.66         | 0.22        | <b>1.25</b>  | <b>0.02</b> |
| EF0908 |  | Hypothetical protein | 0.97         | 0.06        | <b>1.77</b>  | <b>0.00</b> |
| EF1067 |  | Hypothetical protein | -0.10        | 0.83        | <b>-1.22</b> | <b>0.00</b> |
| EF1095 |  | Hypothetical protein | 0.57         | 0.49        | <b>1.73</b>  | <b>0.02</b> |
| EF1107 |  | Hypothetical protein | <b>-1.76</b> | <b>0.00</b> | 0.65         | 0.14        |
| EF1262 |  | Hypothetical protein | 0.68         | 0.17        | <b>1.10</b>  | <b>0.02</b> |
| EF1263 |  | Hypothetical protein | 0.54         | 0.24        | <b>1.11</b>  | <b>0.01</b> |
| EF1309 |  | Hypothetical protein | <b>-1.28</b> | <b>0.02</b> | -0.94        | 0.08        |
| EF1315 |  | Hypothetical protein | <b>-0.98</b> | <b>0.04</b> | 0.32         | 0.52        |
| EF1365 |  | Hypothetical protein | 0.76         | 0.14        | <b>1.32</b>  | <b>0.01</b> |
| EF1375 |  | Hypothetical protein | <b>1.06</b>  | <b>0.01</b> | <b>1.32</b>  | <b>0.00</b> |
| EF1418 |  | Hypothetical protein | -1.05        | 0.10        | <b>-2.48</b> | <b>0.00</b> |
| EF1774 |  | Hypothetical protein | 0.40         | 0.43        | <b>1.08</b>  | <b>0.02</b> |
| EF1946 |  | Hypothetical protein | -0.23        | 0.67        | <b>-1.09</b> | <b>0.02</b> |
| EF1947 |  | Hypothetical protein | -0.50        | 0.41        | <b>-1.35</b> | <b>0.02</b> |
| EF2169 |  | Hypothetical protein | 0.40         | 0.67        | <b>1.83</b>  | <b>0.02</b> |
| EF2229 |  | Hypothetical protein | <b>1.4</b>   | <b>0.04</b> | 0.63         | 0.44        |
| EF2231 |  | Hypothetical protein | <b>2.01</b>  | <b>0.00</b> | 0.97         | 0.13        |
| EF2287 |  | Hypothetical protein | <b>1.58</b>  | <b>0.03</b> | 1.17         | 0.16        |
| EF2317 |  | Hypothetical protein | 0.45         | 0.51        | <b>-1.47</b> | <b>0.02</b> |
| EF2366 |  | Hypothetical protein | -0.64        | 0.13        | <b>-1.39</b> | <b>0.00</b> |
| EF2368 |  | Hypothetical protein | <b>-1.01</b> | <b>0.04</b> | <b>-1.18</b> | <b>0.01</b> |
| EF2466 |  | Hypothetical protein | <b>1.59</b>  | <b>0.01</b> | <b>1.72</b>  | <b>0.00</b> |
| EF2467 |  | Hypothetical protein | <b>1.23</b>  | <b>0.02</b> | -0.43        | 0.42        |

|                                                           |               |                                                        |              |             |              |             |
|-----------------------------------------------------------|---------------|--------------------------------------------------------|--------------|-------------|--------------|-------------|
| EF2490                                                    | <i>cpsF</i>   | Hypothetical protein                                   | 0.23         | 0.69        | <b>1.16</b>  | <b>0.02</b> |
| EF2518*                                                   |               | Hypothetical protein                                   | <b>-0.63</b> | <b>0.02</b> | <b>1.13</b>  | <b>0.01</b> |
| EF2588                                                    |               | Hypothetical protein                                   | -0.08        | 0.89        | <b>1.16</b>  | <b>0.01</b> |
| EF2619                                                    |               | Hypothetical protein                                   | <b>-2.19</b> | <b>0.02</b> | <b>-2.91</b> | <b>0.05</b> |
| EF2707                                                    |               | Hypothetical protein                                   | 0.79         | 0.33        | <b>2.22</b>  | <b>0.02</b> |
| EF2768                                                    |               | Hypothetical protein                                   | <b>2.40</b>  | <b>0.01</b> | 1.10         | 0.29        |
| EF2967                                                    |               | Hypothetical protein                                   | <b>2.13</b>  | <b>0.04</b> | <b>3.06</b>  | <b>0.01</b> |
| EF3087                                                    |               | Hypothetical protein                                   | <b>1.92</b>  | <b>0.00</b> | <b>2.46</b>  | <b>0.00</b> |
| EF3088                                                    |               | Hypothetical protein                                   | <b>1.85</b>  | <b>0.00</b> | <b>2.41</b>  | <b>0.00</b> |
| EF3101                                                    |               | Hypothetical protein                                   | <b>1.15</b>  | <b>0.05</b> | <b>1.61</b>  | <b>0.02</b> |
| EF3247                                                    |               | Hypothetical protein                                   | 0.69         | 0.17        | <b>1.07</b>  | <b>0.03</b> |
| EF3323                                                    |               | Hypothetical protein                                   | <b>0.5</b>   | <b>0.04</b> | <b>2.32</b>  | <b>0.00</b> |
| EFA0017                                                   |               | Hypothetical protein                                   | <b>1.02</b>  | <b>0.02</b> | <b>1.21</b>  | <b>0.00</b> |
| EFA0029                                                   |               | Hypothetical protein                                   | 1.72         | 0.08        | <b>1.99</b>  | <b>0.01</b> |
| EFA0050                                                   |               | Hypothetical protein                                   | <b>1.95</b>  | <b>0.02</b> | <b>1.69</b>  | <b>0.03</b> |
| EFA0051                                                   |               | Hypothetical protein                                   | <b>1.9</b>   | <b>0.03</b> | <b>2.12</b>  | <b>0.02</b> |
| EFB0015                                                   |               | Hypothetical protein                                   | <b>1.63</b>  | <b>0.01</b> | <b>2.78</b>  | <b>0.00</b> |
| <b>Mobile and extrachromosomal element functions</b>      |               |                                                        |              |             |              |             |
| EF0125                                                    |               | IS256 transposase                                      | <b>1.3</b>   | <b>0.02</b> | <b>1.4</b>   | <b>0.01</b> |
| EF0351                                                    |               | Structural protein                                     | <b>1.59</b>  | <b>0.03</b> | <b>1.99</b>  | <b>0.02</b> |
| EF0355                                                    | <i>atlB</i>   | Endolysin                                              | <b>1.83</b>  | <b>0.03</b> | <b>1.98</b>  | <b>0.02</b> |
| EF2145                                                    |               | Integrase, phage family                                | <b>-1.5</b>  | <b>0.00</b> | <b>-1.48</b> | <b>0.00</b> |
| EF2173                                                    |               | ISEf1, transposase                                     | <b>1.51</b>  | <b>0.02</b> | <b>1.39</b>  | <b>0.03</b> |
| EFA0001                                                   | <i>traA-1</i> | Replication-associated protein RepA                    | 1.38         | 0.10        | <b>1.2</b>   | <b>0.04</b> |
| EFA0002                                                   | <i>traB-1</i> | Pheromone shutdown protein TraB                        | 1.10         | 0.10        | <b>2.15</b>  | <b>0.00</b> |
| EFA0003                                                   | <i>traC-1</i> | traC protein                                           | 0.56         | 0.38        | <b>1.59</b>  | <b>0.01</b> |
| EFA0083                                                   | <i>repB-1</i> | Replication-associated protein RepB                    | 0.58         | 0.32        | <b>1.25</b>  | <b>0.02</b> |
| EFB0063                                                   | <i>prgN</i>   | Replication control protein PrgN                       | 1.39         | 0.09        | <b>1.67</b>  | <b>0.04</b> |
| <b>Protein fate</b>                                       |               |                                                        |              |             |              |             |
| EF0302                                                    |               | Aminopeptidase C                                       | -0.59        | 0.26        | <b>-1.04</b> | <b>0.03</b> |
| EF0306                                                    |               | Cro/CI family transcriptional regulator                | -0.71        | 0.11        | <b>-1.01</b> | <b>0.02</b> |
| EF1307                                                    | <i>grpE</i>   | Heat shock protein GrpE                                | <b>-1.49</b> | <b>0.03</b> | -0.70        | 0.30        |
| EF1308                                                    | <i>dnaK</i>   | dnak protein                                           | <b>-1.31</b> | <b>0.04</b> | -1.09        | 0.07        |
| EF1763                                                    | <i>secA</i>   | Preprotein translocase, SecA subunit                   | <b>-1.73</b> | <b>0.04</b> | <b>-2.59</b> | <b>0.05</b> |
| EF2634                                                    | <i>groES</i>  | Chaperonin, 10 kDa                                     | <b>-1.29</b> | <b>0.02</b> | -0.26        | 0.66        |
| <b>Protein synthesis</b>                                  |               |                                                        |              |             |              |             |
| EF0206                                                    | <i>rplC</i>   | 50S ribosomal protein L3                               | <b>-1.18</b> | <b>0.00</b> | <b>-0.87</b> | <b>0.02</b> |
| EF0633                                                    | <i>tryS-1</i> | Tyrosyl-tRNA synthetase                                | -0.68        | 0.17        | <b>1.19</b>  | <b>0.01</b> |
| EF1694                                                    | <i>npsP</i>   | Ribosomal protein S16                                  | <b>-1.19</b> | <b>0.01</b> | 0.05         | 0.95        |
| EF2715                                                    | <i>rplL</i>   | Ribosomal protein L7/L12                               | <b>-1.23</b> | <b>0.01</b> | 0.15         | 0.77        |
| EF2716                                                    | <i>rplJ</i>   | 50S ribosomal protein L10                              | <b>-1.32</b> | <b>0.02</b> | -0.40        | 0.47        |
| EF2731                                                    | <i>rpmG-2</i> | Ribosomal protein L33                                  | <b>-1.08</b> | <b>0.01</b> | <b>-1.47</b> | <b>0.00</b> |
| <b>Purines, pyrimidines, nucleosides, and nucleotides</b> |               |                                                        |              |             |              |             |
| EF1714                                                    | <i>pyrD</i>   | Dihydroorotate dehydrogenase                           | <b>-1.44</b> | <b>0.03</b> | -0.36        | 0.61        |
| EF1715                                                    | <i>pyrDII</i> | Dihydroorotate dehydrogenase electron transfer subunit | <b>-1.63</b> | <b>0.02</b> | -0.61        | 0.38        |

|                                       |              |                                                       |              |             |              |             |
|---------------------------------------|--------------|-------------------------------------------------------|--------------|-------------|--------------|-------------|
| EF1716                                | <i>carB</i>  | Carbamoyl-phosphate synthase, large subunit           | <b>-1.72</b> | <b>0.02</b> | -0.86        | 0.19        |
| EF1717                                | <i>pyraA</i> | Carbamoyl-phosphate synthase, small subunit           | <b>-1.64</b> | <b>0.04</b> | -0.85        | 0.27        |
| EF1720                                |              | Uracil permease                                       | <b>-1.39</b> | <b>0.05</b> | -0.48        | 0.50        |
| <b>Regulatory functions</b>           |              |                                                       |              |             |              |             |
| EF0129                                |              | Transcription regulator                               | -0.85        | 0.08        | <b>-1.36</b> | <b>0.01</b> |
| EF0869                                |              | Cro/CI family transcriptional regulator               | -0.67        | 0.13        | <b>-1.06</b> | <b>0.02</b> |
| EF1297                                |              | PadR family transcriptional regulator                 | -1.05        | 0.12        | <b>-1.84</b> | <b>0.01</b> |
| EF1306                                | <i>hrcA</i>  | Heat-inducible transcription repressor HrcA           | <b>-1.64</b> | <b>0.01</b> | -0.40        | 0.55        |
| EF1357                                |              | AraC family transcriptional regulator                 | -0.28        | 0.68        | <b>-1.64</b> | <b>0.04</b> |
| EF1579                                | <i>lexA</i>  | LexA repressor                                        | -0.51        | 0.16        | <b>-1.10</b> | <b>0.00</b> |
| EF1709                                |              | GntR family sugar-binding transcriptional regulator   | <b>-1.31</b> | <b>0.01</b> | <b>-0.95</b> | <b>0.05</b> |
| EF2291*                               |              | Cro/CI family transcriptional regulator               | <b>1.16</b>  | <b>0.01</b> | <b>-0.86</b> | <b>0.03</b> |
| EF2966                                |              | BglG family transcriptional antiterminator            | <b>-1.74</b> | <b>0.00</b> | -0.22        | 0.70        |
| EFA0071                               |              | PemK family protein                                   | <b>-0.75</b> | <b>0.05</b> | <b>-1.00</b> | <b>0.01</b> |
| EFB0005.1                             |              | Transcriptional regulator, Cro/CI family              | <b>0.99</b>  | <b>0.05</b> | <b>2.02</b>  | <b>0.00</b> |
| <b>Signal transduction</b>            |              |                                                       |              |             |              |             |
| EF0406                                |              | PTS system, component                                 | <b>1.74</b>  | <b>0.04</b> | 1.28         | 0.08        |
| EF0958                                | <i>makT</i>  | PTS system component                                  | <b>1.33</b>  | <b>0.03</b> | 1.20         | 0.08        |
| EF1126                                |              | PTS system component                                  | -0.64        | 0.53        | <b>-2.3</b>  | <b>0.02</b> |
| EF2598                                |              | PTS system component                                  | <b>2.59</b>  | <b>0.02</b> | 1.80         | 0.06        |
| EFA0067                               |              | PTS system. IIABC components                          | <b>1.13</b>  | <b>0.02</b> | 0.06         | 0.97        |
| <b>Transcription</b>                  |              |                                                       |              |             |              |             |
| EF2617                                | <i>vacB</i>  | Ribonuclease R                                        | <b>-1.09</b> | <b>0.02</b> | -0.80        | 0.07        |
| EF2729                                | <i>nusG</i>  | Transcription antitermination protein NusG            | <b>-2.24</b> | <b>0.00</b> | <b>-1.81</b> | <b>0.00</b> |
| <b>Transport and binding proteins</b> |              |                                                       |              |             |              |             |
| EF0022                                |              | PTS system component                                  | 0.67         | 0.29        | <b>1.42</b>  | <b>0.02</b> |
| EF0246                                |              | Amino acid ABC transporter, ATP-binding protein       | 0.49         | 0.36        | <b>1.06</b>  | <b>0.04</b> |
| EF0431                                |              | TRAP dicarboxylate transporter DctM subunit, putative | <b>2.13</b>  | <b>0.02</b> | <b>1.67</b>  | <b>0.04</b> |
| EF0475                                | <i>feoA</i>  | Ferrous iron transport protein A, putative            | -0.45        | 0.52        | <b>-1.33</b> | <b>0.03</b> |
| EF0909                                |              | Peptide ABC transporter, permease                     | 0.30         | 0.56        | <b>1.09</b>  | <b>0.02</b> |
| EF0938                                |              | Sugar ABC transporter ATP-binding protein             | <b>-1.31</b> | <b>0.01</b> | -0.69        | 0.11        |
| EF1027                                |              | Putative transport protein SgaT protein               | NA           | NA          | <b>-2.5</b>  | <b>0.02</b> |
| EF1127                                | <i>ulaA</i>  | PTS system ascorbate-specific transporter subunit IIC | -0.38        | 0.77        | <b>-2.5</b>  | <b>0.02</b> |
| EF1398                                |              | Molybdenum ABC transporter, permease protein          | <b>1.4</b>   | <b>0.03</b> | 0.09         | 0.93        |
| EF2232                                |              | Sugar ABC transporter, permease                       | <b>1.97</b>  | <b>0.01</b> | 1.44         | 0.16        |
| EF2233                                |              | Sugar ABC transporter, permease                       | <b>1.62</b>  | <b>0.01</b> | 0.54         | 0.47        |
| EF2394                                |              | ABC transporter ATP-binding protein                   | -0.46        | 0.21        | <b>-1.00</b> | <b>0.01</b> |
| EF2650                                |              | Spermidine/putrescine ABC transporter, permease       | 0.35         | 0.53        | <b>1.05</b>  | <b>0.04</b> |
| EF2720                                |              | ABC transporter ATP-binding protein                   | <b>-1.81</b> | <b>0.00</b> | <b>-1.22</b> | <b>0.02</b> |
| EF2769                                |              | ABC transporter ATP-binding protein                   | <b>2.51</b>  | <b>0.00</b> | 0.70         | 0.44        |
| EF2992                                |              | Major facilitator family transporter                  | <b>1.14</b>  | <b>0.02</b> | 0.43         | 0.46        |
| EF3004                                |              | Sulfate permease family protein                       | 0.55         | 0.20        | <b>1.41</b>  | <b>0.01</b> |
| EF3015                                |              | Serine/threonine transporter SstT                     | <b>0.98</b>  | <b>0.05</b> | <b>1.51</b>  | <b>0.01</b> |
| EF3099                                |              | Transporter accessory protein. putative               | -0.13        | 0.93        | <b>-3.09</b> | <b>0.03</b> |

|                         |             |                                                                  |              |             |              |             |
|-------------------------|-------------|------------------------------------------------------------------|--------------|-------------|--------------|-------------|
| EF3108                  |             | Peptide ABC transporter, permease                                | 0.08         | 0.87        | <b>1.00</b>  | <b>0.02</b> |
| EF3277                  |             | Cytosine permease, putative                                      | <b>1.46</b>  | <b>0.01</b> | <b>2.57</b>  | <b>0.00</b> |
| EFA0014                 |             | Drug resistance transporter. putative                            | 0.75         | 0.27        | <b>1.78</b>  | <b>0.00</b> |
| EFB0050                 |             | Toxin ABC transporter. ATP-binding/permease protein              | 0.02         | 0.98        | <b>1.17</b>  | <b>0.03</b> |
| <b>Unknown function</b> |             |                                                                  |              |             |              |             |
| EF0468                  |             | lemA protein                                                     | <b>-1.37</b> | <b>0.01</b> | <b>-1.05</b> | <b>0.04</b> |
| EF0512                  |             | DNA-damage-inducible protein. putative                           | <b>-0.79</b> | <b>0.03</b> | <b>-1.11</b> | <b>0.00</b> |
| EF0796                  |             | Type 2 phosphatidic acid phosphatase family protein              | 1.20         | 0.08        | <b>1.57</b>  | <b>0.02</b> |
| EF0856                  |             | Aldo/keto reductase family protein                               | <b>-1.11</b> | <b>0.02</b> | <b>-1.00</b> | <b>0.03</b> |
| EF1025                  |             | CBS domain-containing protein                                    | -0.64        | 0.24        | <b>-1.29</b> | <b>0.01</b> |
| EF1108                  |             | Oxidoreductase, putative                                         | <b>-1.62</b> | <b>0.00</b> | -0.84        | 0.07        |
| EF1110                  |             | YkgG family protein                                              | <b>-1.52</b> | <b>0.01</b> | -0.50        | 0.37        |
| EF2214                  |             | Glyoxylase family protein                                        | 1.05         | 0.08        | <b>1.28</b>  | <b>0.03</b> |
| EF2436                  | <i>murQ</i> | N-acetylmuramic acid-6-phosphate etherase                        | <b>-1.56</b> | <b>0.04</b> | <b>-1.49</b> | <b>0.04</b> |
| EF2577                  |             | Aspartate/ornithine carbamoyltransferase family protein          | <b>1.04</b>  | <b>0.03</b> | 0.32         | 0.51        |
| EF2738                  | <i>ahpF</i> | Thioredoxin reductase                                            | <b>-1.43</b> | <b>0.01</b> | -0.96        | 0.06        |
| EF2756                  | <i>dinP</i> | DNA-damage-inducible protein P                                   | -0.78        | 0.26        | <b>-1.34</b> | <b>0.04</b> |
| EF2874                  |             | HAD superfamily hydrolase                                        | <b>-1.22</b> | <b>0.04</b> | <b>-1.17</b> | <b>0.04</b> |
| EF2933                  |             | Redox-sensing transcriptional repressor Rex                      | -0.64        | 0.12        | <b>-0.95</b> | <b>0.02</b> |
| EF3114                  |             | DAK2 domain-containing protein                                   | -0.16        | 0.68        | <b>-1.00</b> | <b>0.01</b> |
| EF3311                  | <i>gidA</i> | tRNA uridine 5-carboxymethylaminomethyl modification enzyme GidA | 0.83         | 0.16        | <b>1.34</b>  | <b>0.02</b> |
| EFA0072                 |             | PemI family protein                                              | <b>-0.95</b> | <b>0.01</b> | <b>-1.48</b> | <b>0.00</b> |
